# Supplementary material for: Pt/Ru/C nanocomposites for methanol electrooxidation: how Ru nanocrystals’ surface structure affects catalytic performance of deposited Pt particles
Source: Royal Society of Chemistry journal article supplement (doi:10.1039/c3qi00053b), 2014-01-01
Supplement: c3qi00053b.pdf [file c3qi00053b.pdf]

*Supporting Information for*

**Pt/Ru/C Nanocomposites for Methanol Electrooxidation: How Ru Nanocrystals' Surface Structure Affects Catalytic Performance of Deposited Pt Particles**

Jun Gu, Wen-Chi Liu, Ze-Qiong Zhao, Guang-Xu Lan and Ya-Wen Zhang\*

*Beijing National Laboratory for Molecular Science, State Key Laboratory of Rare Earth Materials Chemistry and Applications, PKU-HKU Joint Laboratory in Rare Earth Materials and Bioinorganic Chemistry, College of Chemistry and Molecular Engineering, Peking University, Beijing 100871, China. E-mail: ywzhang@pku.edu.cn; Fax: +86 10 62756787; Tel: +86 10 62756787*

**Preparation of the mixed catalysts of commercial Pt/C and Ru NCs.**

50  $\mu\text{L}$  of the ethanol dispersion of commercial Pt/C with a concentration of 1 mg/mL and 50  $\mu\text{L}$  of the ethanol dispersion of Ru nanocrystals (triangular plates (TPs), Ru capped columns or Ru nanospheres (NSs)) containing 5.2  $\mu\text{g}$  Ru were mixed together in a vial, followed by ultrasonic treatment for 15 min. For electrocatalytic tests, 20  $\mu\text{L}$  of the mixed dispersion was dropped on the glassy carbon electrode and dried, followed by the addition of 5  $\mu\text{L}$  of Nafion (0.2 wt% ethanol solution).

**Table S1.** Ratios of Ru and Pt elements in different valent states obtained from XPS analyses.

|                  | <b>Ru(IV)/Ru(0)</b> | <b>Pt(IV)/Pt(II)/Pt(0)</b> |
|------------------|---------------------|----------------------------|
| <b>Pt/Ru TPs</b> | 21:79               | 7:33:60                    |
| <b>Pt/Ru CCs</b> | 17:83               | 4:41:55                    |
| <b>Pt/Ru NSs</b> | 40:60               | 6:30:64                    |

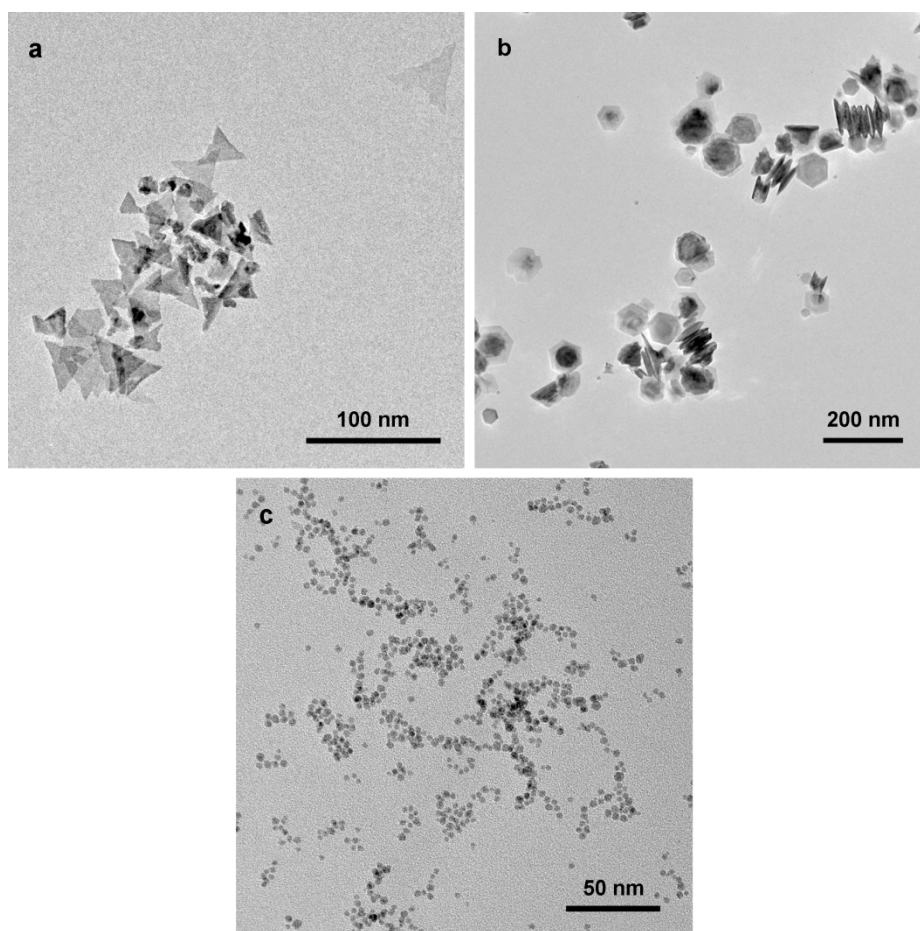

**Figure S1.** TEM images of (a) Ru TPs, (b) Ru CCs and (c) Ru NSs.

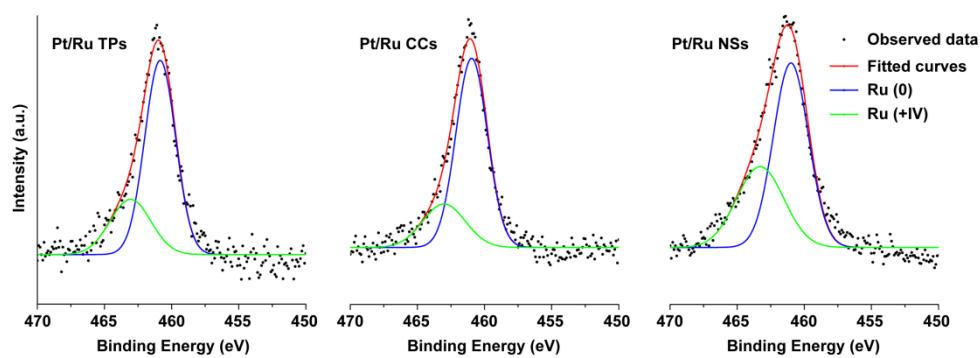

**Figure S2.** Observed Ru  $3p_{3/2}$  photoelectron spectra of Pt/Ru NCs composites compared with fitted data.

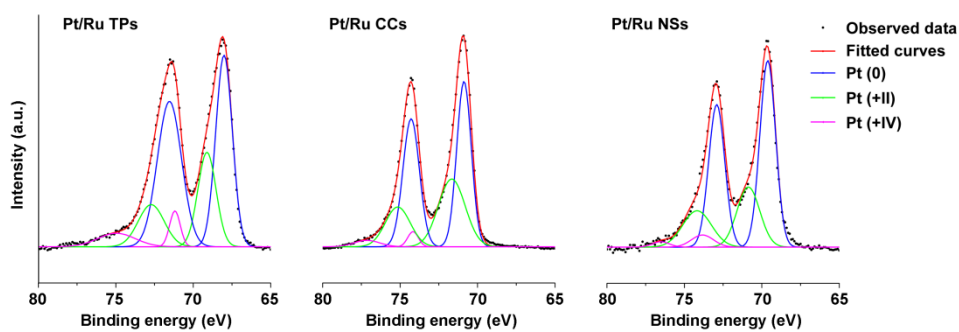

**Figure S3.** Observed Pt  $4f_{5/2}$  and  $4f_{7/2}$  photoelectron spectra of Pt/Ru NCs composites compared with fitted data.

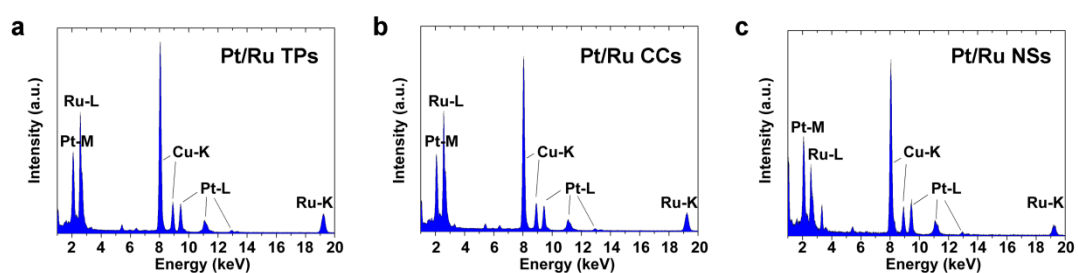

**Figure S4.** Energy dispersive X-ray spectra of (a) Pt/Ru TPs, (b) Pt/Ru CCs and (c) Pt/Ru NSs.

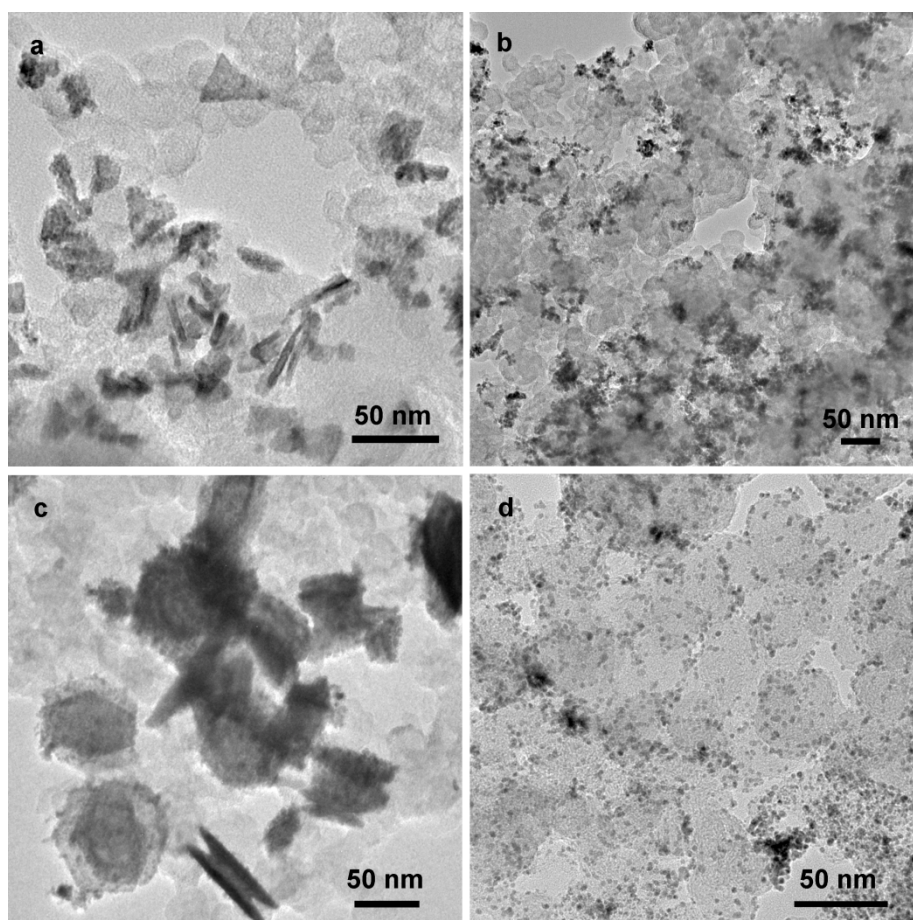

**Figure S5.** TEM images of (a) Pt/Ru TPs/C, (b) Pt/Ru NSs/C, (c) Pt/Ru CCs/C and (d) commercial Pt/C.

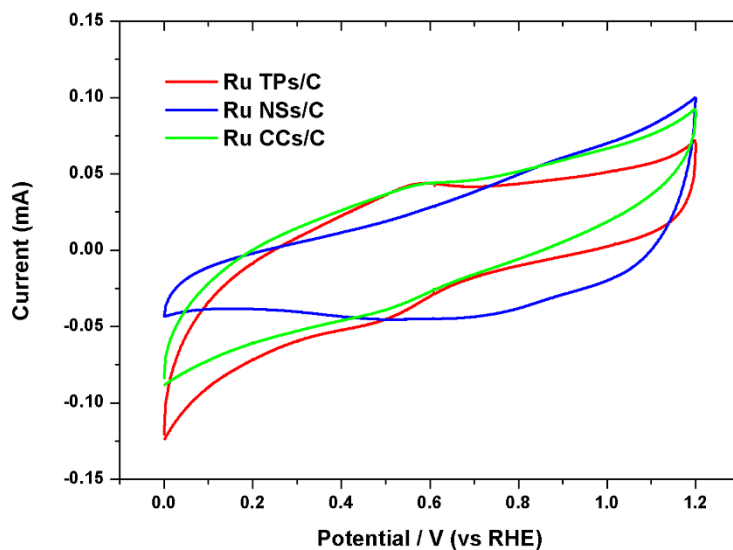

**Figure S6.** CV curves of Ru TPs/C, Ru NSs/C and Ru CCs/C in 0.1 M HClO<sub>4</sub> at the scanning rate of 50 mV/s.

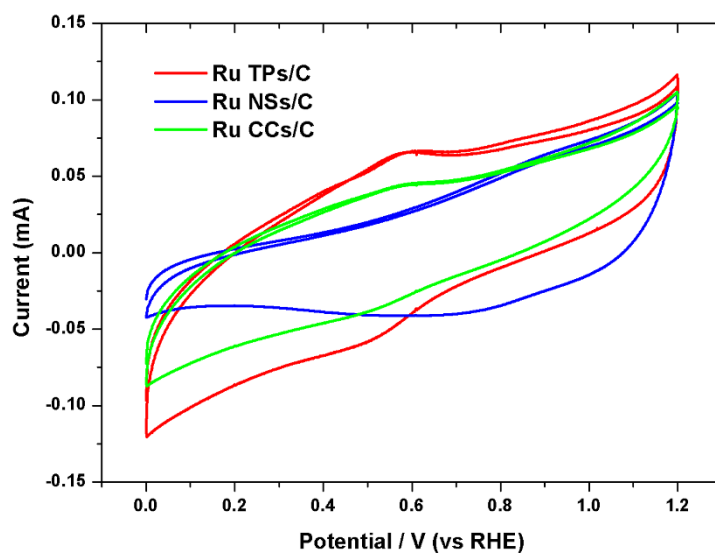

**Figure S7.** The first cycle and the forward scan of the second cycle of CO stripping tests of Ru TPs/C, Ru NSs/C and Ru CCs/C in 0.1 M HClO<sub>4</sub> at the scanning rate of 50 mV/s.

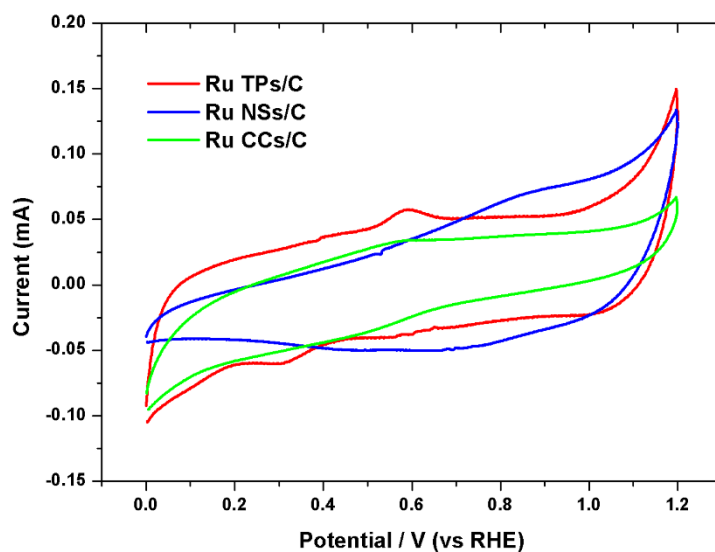

**Figure S8.** CV curves of Ru TPs/C, Ru NSs/C and Ru CCs/C in 0.1 M HClO<sub>4</sub> and 0.1 M MeOH at the scanning rate of 50 mV/s.

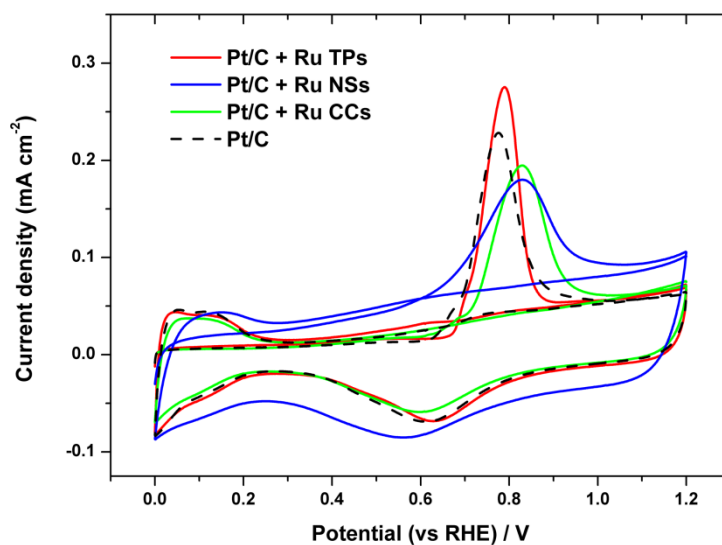

**Figure S9.** The first cycle and the forward scan of the second cycle of CO stripping tests of the mixtures of Pt/C and Ru NCs in 0.1 M HClO<sub>4</sub> at the scanning rate of 50 mV/s.

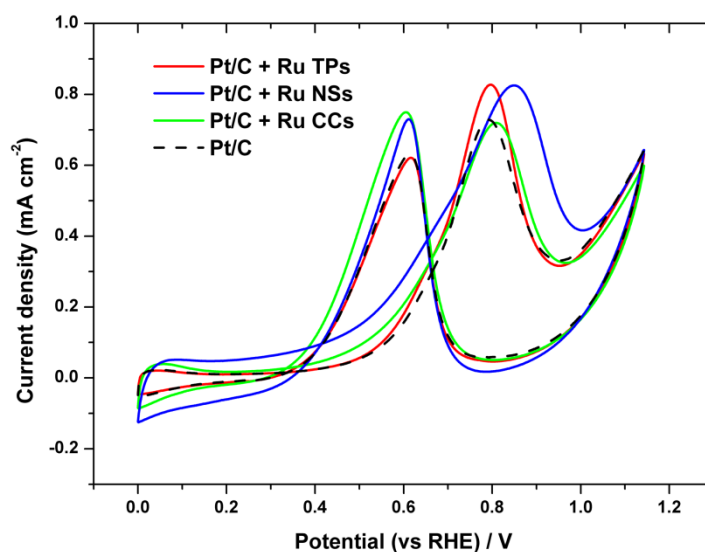

**Figure S10.** CV curves of the mixtures of Pt/C and Ru NCs in 0.1 M HClO<sub>4</sub> and 0.1 M MeOH at the scanning rate of 50 mV/s.

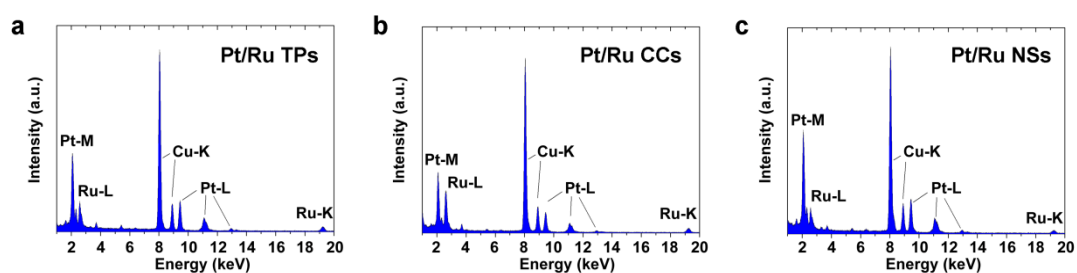

**Figure S11.** Energy dispersive X-ray spectra of (a) Pt/Ru TPs, (b) Pt/Ru CCs and (c) Pt/Ru NSs after 4 000 cycles of voltage scan in HClO<sub>4</sub>-MeOH mixed solution.

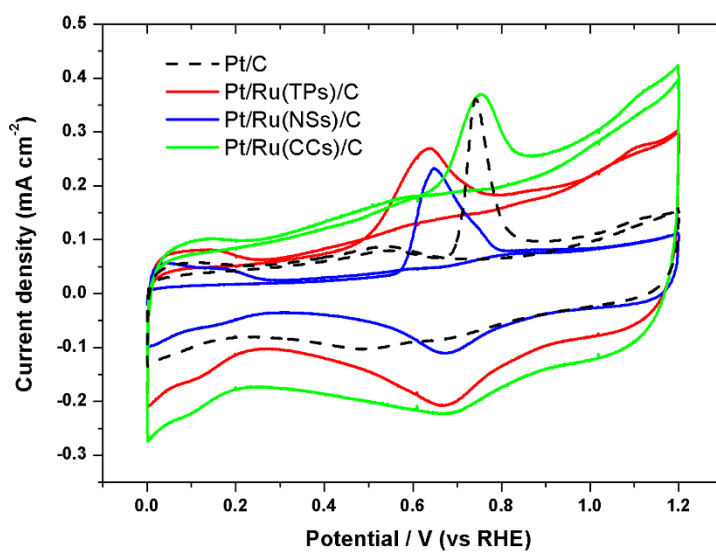



**Figure S12.** The first cycle and the forward scan of the second cycle of CO stripping tests of Pt/Ru NCs/C and Pt/C in 0.1 M HClO<sub>4</sub> at the scanning rate of 50 mV/s after 4 000 cycles of voltage scan.

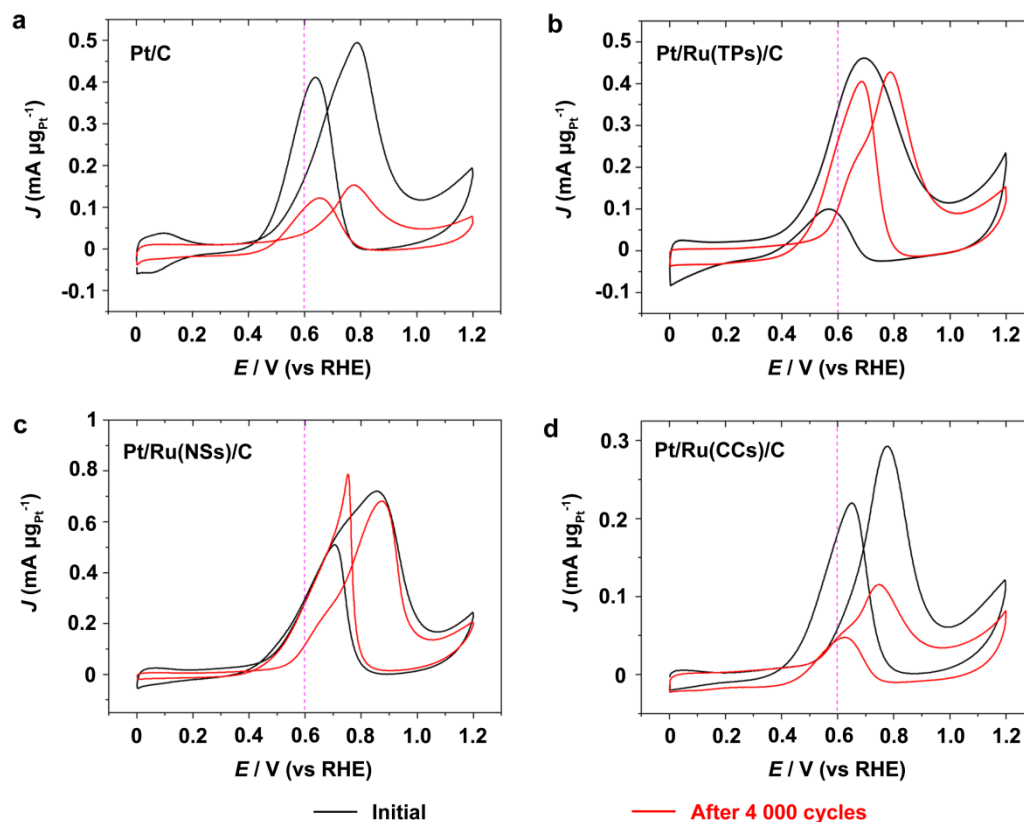

**Figure S13.** Stable CV curves of as-prepared catalysts and catalysts after 4 000 cycles of voltage scan between 0 and 1.2 V vs RHE of Pt/C (a), Pt/Ru TPs (b), Pt/Ru NSs (c) and Pt/Ru TPs (d) in 0.1 M HClO<sub>4</sub> and 0.1 M MeOH at the scanning rate of 50 mV/s. Violet dashed vertical line marks 0.6 V vs RHE.
